# Supplementary material for: The Effects of Natural Iron Fertilisation on Deep-Sea Ecology: The Crozet Plateau, Southern Indian Ocean
Source: PLoS One. 2011 Jun 14;6(6):e20697. doi: 10.1371/journal.pone.0020697 (PMC3114783; doi:10.1371/journal.pone.0020697)
Supplement: Table S1 — Abundance and biomass (wet weight) data for Echinoderm megafauna. Station numbers are taken from ref 19. (DOCX) [file pone.0020697.s001.docx]

| | **Station** | | **+Fe 1**  **15773#8** | **+Fe 2**  **15773#17** | **+Fe 3**  **15573#23** | **+Fe 4**  **15773#32** | **HNLC 1**  **15775#13** | **HNLC 2**  **15775#4** | **+Fe 1**  **15773#8** | **+Fe 2**  **15773#17** | **+Fe 3**  **15773#23** | **+Fe 4**  **15773#23** | **HNLC 1**  **15775#13** | **HNLC 2**  **15775#4** | | --- | --- | --- | --- | --- | --- | --- | --- | --- | --- | --- | --- | --- | --- | | **Area Fished (ha)** | | 2.532 | 6.833 | 10.751 | 4.714 | 4.571 | 4.316 | 2.532 | 6.833 | 10.751 | 4.714 | 4.571 | 4.316 | | **Taxon** | **Species** | **ABUNDANCE (ind. ha-1)** | | | | | | **BIOMASS (g ha-1)** | | | | | | | Asteroidea | *Eremicaster crassus* | 9.48 | 8.20 |  | 15.91 | 1.53 | 5.10 | 17.89 | 17.47 |  | 23.19 | 6.08 | 18.79 | | Asteroidea | *Freyella sp.* |  |  | 0.19 |  |  |  |  |  | 0.47 |  |  |  | | Asteroidea | *Hymenaster crucifer* | 3.16 | 4.39 | 1.58 | 2.33 |  |  | 92.93 | 126.84 | 49.86 | 58.02 |  |  | | Asteroidea | *Hyphalaster australis* | 1.58 | 2.78 | 8.74 | 2.76 | 1.97 | 1.62 | 3.79 | 8.88 | 17.91 | 9.21 | 12.40 | 9.43 | | Asteroidea | *Hyphalaster inermis* |  | 0.73 |  | 0.85 |  | 1.85 |  | 4.96 |  | 7.02 |  | 45.51 | | Asteroidea | *Lonchotaster tartareus* |  | 0.44 |  |  | 2.41 | 6.02 |  | 17.88 |  |  | 26.19 | 109.48 | | Asteroidea | *Lophaster ?antarcticus* |  | 0.44 |  |  |  |  |  | 0.44 |  |  |  |  | | Asteroidea | *Paralophaster lorioli* | 0.79 | 0.29 |  | 0.21 | 0.66 | 0.93 | 1.30 | 0.94 |  | 0.11 | 1.31 | 1.25 | | Asteroidea | *Porcellanaster ceruleus* | 4.74 | 1.02 | 1.30 | 7.85 | 26.47 | 30.35 | 2.84 | 0.45 | 0.54 | 3.80 | 8.37 | 9.61 | | Asteroidea | *Pteraster ?hunteri* |  | 0.15 |  |  |  |  |  | 0.18 |  |  |  |  | | Asteroidea | *Pteraster sp.* | 1.18 |  |  |  |  |  | 0.95 |  |  |  |  |  | | Asteroidea | *Styracaster robustus* | 5.53 | 9.22 | 4.28 | 9.55 | 13.56 | 12.74 | 63.23 | 55.96 | 29.88 | 69.41 | 214.31 | 247.15 | | Ophiuroidea | *Amphioplus antarctica* |  |  |  | 40.94 |  |  |  |  |  | 8.82 |  |  | | Ophiuroidea | *Amphioplus daleus* | 148.10 | 99.08 | 62.88 | 289.78 | 37.19 | 38.69 | 40.19 | 30.37 | 18.81 | 69.82 | 6.77 | 6.46 | | Ophiuroidea | *Amphiura studeri (antarctica)* | 27.25 | 13.46 | 11.72 | 0.00 |  |  | 5.09 | 2.90 | 2.38 |  |  |  | | Ophiuroidea | *Ophiernus quadrispinus* | 10.66 | 12.59 | 5.21 |  |  | 3.94 | 5.61 | 5.69 | 2.28 |  |  | 2.37 | | Ophiuroidea | *Ophiolepis ?scissa* |  | 2.93 |  |  |  | 1.16 |  | 0.34 |  |  |  | 0.06 | | Ophiuroidea | *Ophiotrema tertium* |  | 0.15 |  |  | 31.72 | 116.77 |  | 0.01 |  |  | 3.65 | 15.02 | | Ophiuroidea | *Ophiuria irrorata loveni* | 30.81 | 49.17 | 28.18 | 67.88 | 11.38 | 30.35 | 29.86 | 47.08 | 24.19 | 64.35 | 10.66 | 28.71 | | Ophiuroidea | *Ophiuria lienosa* | 277.25 | 146.06 | 69.67 | 506.15 | 147.01 | 179.10 | 92.69 | 40.42 | 17.50 | 121.20 | 57.68 | 71.57 | | Ophiuroidea | *Opiacantha cosmica* | 11.45 | 5.56 | 4.09 | 15.49 | 19.25 | 47.73 | 4.03 | 3.53 | 2.67 | 8.40 | 7.66 | 30.63 | | Echinoidea | *Echinoidea spp fragments total* |  |  |  |  |  |  | 12.16 | 0.44 | 1.79 |  | 4.44 | 61.58 | | Echinoidea | *Kamptosoma abyssale* |  | 0.15 | 0.37 | 0.42 | 0.66 | 2.09 |  | 0.70 | 2.40 | 2.08 | 2.63 | 7.97 | | Holothuroidea | *Abyssocucumis abyssorum* | 26.86 | 23.71 | 0.37 | 41.79 | 5.91 | 4.40 | 316.59 | 170.38 | 0.85 | 413.19 | 46.90 | 34.66 | | Holothuroidea | *Amperima robusta* | 15.01 | 40.68 | 20.18 | 32.03 | 4.59 | 3.71 | 112.84 | 184.00 | 173.32 | 179.55 | 3.04 | 1.30 | | Holothuroidea | *Bathyplotes gourdoni* | 1.18 |  | 0.28 | 0.21 |  |  | 2.05 |  | 0.78 | 0.04 |  |  | | Holothuroidea | *Bathyplotes natans* |  | 0.15 |  | 0.21 |  |  |  | 0.69 |  | 0.36 |  |  | | Holothuroidea | *Benthodytes abyssicola* | 3.16 | 4.98 | 6.42 | 6.36 | 2.84 | 4.17 | 197.87 | 281.69 | 369.56 | 440.64 | 143.82 | 119.37 | | Holothuroidea | *Benthodytes sanguinolenta* | 11.45 | 14.93 | 12.37 | 16.97 | 3.72 | 2.55 | 320.26 | 230.51 | 326.57 | 262.71 | 68.30 | 66.52 | | Holothuroidea | *Benthodytes wolffi* | 1.18 | 0.73 | 0.09 | 4.03 | 5.69 | 3.01 | 54.11 | 12.59 | 0.17 | 69.52 | 33.41 | 34.92 | | Holothuroidea | *Ellipinion papillosum* | 1.97 | 0.29 |  | 1.91 | 0.22 | 0.93 | 14.89 | 0.75 |  | 12.22 | 0.04 | 0.58 | | Holothuroidea | *Elpidia ?theeli* |  |  |  |  | 11.81 | 7.18 |  |  |  |  | 1.11 | 0.39 | | Holothuroidea | *Enypniastes exigua* | 0.39 |  |  |  |  |  | 1.07 |  |  |  |  |  | | Holothuroidea | *Gebrukothuria profundus* |  |  | 0.09 |  |  |  |  |  | 14.00 |  |  |  | | Holothuroidea | *Kolga nana* |  |  |  |  | 2.84 | 338.74 |  |  |  |  | 0.23 | 17.28 | | Holothuroidea | *Laetmogone wyvillethomsoni* | 2.76 | 1.32 | 1.21 | 1.91 |  |  | 27.13 | 12.59 | 27.17 | 8.95 |  |  | | Holothuroidea | *Mesothuria edwardensis* |  |  |  |  | 0.44 |  |  |  |  |  | 4.92 |  | | Holothuroidea | *Molpadia blakei* | 0.79 | 3.07 | 1.40 | 4.24 | 0.88 | 0.70 | 42.46 | 47.56 | 60.27 | 89.41 | 11.31 | 2.09 | | Holothuroidea | *Molpadiodemas aff atlanticus* | 14.22 | 29.42 | 26.79 | 56.43 |  |  | 649.13 | 624.02 | 1125.12 | 1885.00 |  |  | | Holothuroidea | *Molpadiodemas crinitus* | 0.79 | 0.88 | 0.56 | 1.91 |  |  | 28.59 | 18.10 | 13.60 | 25.69 |  |  | | Holothuroidea | *Molpadiodemas involutus* |  |  | 0.19 |  |  |  |  |  | 0.13 |  |  |  | | Holothuroidea | *Molpadiodemas morbillus* | 4.34 | 9.81 | 7.53 | 16.76 |  |  | 296.25 | 388.10 | 453.06 | 861.46 |  |  | | Holothuroidea | *Molpadiodemas translucens* | 0.79 | 0.73 | 0.28 | 0.85 | 0.22 | 0.46 | 3.55 | 3.48 | 1.36 | 3.84 | 0.24 | 3.75 | | Holothuroidea | *Molpadiodemas villosus* |  | 0.15 | 0.65 |  |  |  |  | 0.25 | 2.98 |  |  |  | | Holothuroidea | *Oneirophanta mutabilis* | 16.98 | 21.95 | 17.86 | 35.43 | 0.66 | 4.17 | 212.40 | 259.92 | 247.74 | 466.84 | 0.24 | 17.68 | | Holothuroidea | *Paelopatides confundens* |  |  |  | 0.85 |  |  |  |  |  | 7.68 |  |  | | Holothuroidea | *Paelopatides grisea* | 2.76 | 2.20 | 3.53 | 7.85 | 1.09 | 0.23 | 32.94 | 39.18 | 117.56 | 152.61 | 9.69 | 3.92 | | Holothuroidea | *Paroriza sp. A* |  |  | 0.09 |  |  |  |  |  | 21.04 |  |  |  | | Holothuroidea | *Paroriza sp. B* |  |  |  | 0.21 |  |  |  |  |  | 3.63 |  |  | | Holothuroidea | *Peniagone crozeti* | 280.41 | 207.38 | 165.38 | 471.79 | 18.38 | 6.49 | 1353.44 | 553.23 | 552.97 | 1658.78 | 40.47 | 13.44 | | Holothuroidea | *Peniagone affinis* | 3.95 | 3.51 | 2.51 | 5.09 | 78.98 | 113.30 | 49.76 | 24.62 | 10.52 | 57.28 | 365.35 | 677.07 | | Holothuroidea | *Peniagone challengeri* | 65.96 | 65.86 | 59.53 | 88.46 | 6.13 | 5.10 | 188.47 | 110.89 | 119.32 | 141.79 | 14.37 | 6.72 | | Holothuroidea | *Peniagone diaphana* | 0.39 |  | 0.09 |  | 1.09 | 0.46 | 0.51 |  | 0.10 |  | 0.20 | 0.23 | | Holothuroidea | *Peniagone elongata* | 9.87 | 9.66 | 17.02 | 14.85 | 66.94 | 52.83 | 42.30 | 29.97 | 47.56 | 44.25 | 85.04 | 65.66 | | Holothuroidea | *Peniagone gracilis* | 0.79 | 0.59 | 1.02 | 0.85 | 14.00 | 6.95 | 2.69 | 0.44 | 1.58 | 2.50 | 8.25 | 2.72 | | Holothuroidea | *Peniagone horrifer* | 4.74 | 0.44 | 0.84 | 0.42 | 20.56 | 8.11 | 11.33 | 0.69 | 1.33 | 0.64 | 17.65 | 9.22 | | Holothuroidea | *Peniagone purpurea* |  |  |  |  | 12.69 | 5.10 |  |  |  |  | 4.38 | 2.32 | | Holothuroidea | *Peniagone vitrea* | 0.79 | 0.44 | 0.28 | 1.06 | 8.09 | 12.97 | 1.03 | 0.37 | 0.32 | 0.87 | 7.74 | 9.13 | | Holothuroidea | *Peniagone willemoesi* | 1.97 | 1.90 | 1.77 | 1.70 | 99.32 | 91.98 | 5.33 | 4.96 | 5.24 | 3.01 | 157.97 | 113.99 | | Holothuroidea | *Protankyra brychia* | 2.76 | 2.34 | 0.74 | 4.03 |  | 4.17 | 8.45 | 4.05 | 1.55 | 10.27 |  | 15.18 | | Holothuroidea | *Pseudostichopus echinatus* |  |  | 0.09 |  |  |  |  |  | 0.10 |  |  |  | | Holothuroidea | *Pseudostichopus mollis* | 0.79 | 1.61 | 1.67 | 1.70 | 0.22 | 0.46 | 2.73 | 4.20 | 4.64 | 4.54 | 2.03 | 5.68 | | Holothuroidea | *Pseudostichopus peripatus* | 5.13 | 0.88 | 3.35 |  | 1.97 |  | 3.79 | 1.26 | 1.93 |  | 0.97 |  | | Holothuroidea | *Pseudostichopus sp.* |  | 0.15 | 0.19 |  |  |  |  | 0.28 | 0.27 |  |  |  | | Holothuroidea | *Psychrelpidia verrucosa* | 1.18 | 0.73 | 0.65 | 0.21 | 1.75 | 0.23 | 3.95 | 0.66 | 0.55 | 0.19 | 2.87 | 0.14 | | Holothuroidea | *Psychroplanes convexa* |  |  | 0.09 |  | 2.19 | 3.01 |  |  | 0.39 |  | 1.44 | 1.99 | | Holothuroidea | *Psychropotes scotiae* | 2.76 | 0.59 | 1.40 | 0.64 | 0.22 | 3.48 | 110.78 | 22.22 | 122.22 | 36.61 | 0.02 | 15.75 | | Holothuroidea | *Psychropotes longicauda* | 8.29 | 14.20 | 10.70 | 19.52 | 1.53 | 3.94 | 1137.68 | 1098.58 | 1140.28 | 1568.48 | 115.07 | 95.76 | | Holothuroidea | *Psychrotrephes discoveryi* |  | 0.59 | 0.47 | 1.06 | 0.88 | 1.16 |  | 3.76 | 33.79 | 27.13 | 4.68 | 4.36 | | Holothuroidea | *Scotoplanes globosa* | 1.97 | 2.34 | 0.84 | 2.33 |  |  | 94.31 | 46.45 | 28.43 | 98.79 |  |  | | Holothuroidea | *Ypsilothuria sp.* |  | 0.15 | 0.47 | 0.42 |  |  |  | 0.31 | 0.76 | 0.57 |  |  | | Holothuroidea | *Zygothuria lactea* |  |  |  |  | 0.44 |  |  |  |  |  | 0.35 |  | |  |  |  |  |  |  |  |  |  |  |  |  |  |  |  |  |
| --- | --- | --- | --- | --- | --- | --- | --- | --- | --- | --- | --- | --- | --- | --- | --- | --- | --- | --- | --- | --- | --- | --- | --- | --- | --- | --- | --- | --- | --- | --- | --- | --- | --- | --- | --- | --- | --- | --- | --- | --- | --- | --- | --- | --- | --- | --- | --- | --- | --- | --- | --- | --- | --- | --- | --- | --- | --- | --- | --- | --- | --- | --- | --- | --- | --- | --- | --- | --- | --- | --- | --- | --- | --- | --- | --- | --- | --- | --- | --- | --- | --- | --- | --- | --- | --- | --- | --- | --- | --- | --- | --- | --- | --- | --- | --- | --- | --- | --- | --- | --- | --- | --- | --- | --- | --- | --- | --- | --- | --- | --- | --- | --- | --- | --- | --- | --- | --- | --- | --- | --- | --- | --- | --- | --- | --- | --- | --- | --- | --- | --- | --- | --- | --- | --- | --- | --- | --- | --- | --- | --- | --- | --- | --- | --- | --- | --- | --- | --- | --- | --- | --- | --- | --- | --- | --- | --- | --- | --- | --- | --- | --- | --- | --- | --- | --- | --- | --- | --- | --- | --- | --- | --- | --- | --- | --- | --- | --- | --- | --- | --- | --- | --- | --- | --- | --- | --- | --- | --- | --- | --- | --- | --- | --- | --- | --- | --- | --- | --- | --- | --- | --- | --- | --- | --- | --- | --- | --- | --- | --- | --- | --- | --- | --- | --- | --- | --- | --- | --- | --- | --- | --- | --- | --- | --- | --- | --- | --- | --- | --- | --- | --- | --- | --- | --- | --- | --- | --- | --- | --- | --- | --- | --- | --- | --- | --- | --- | --- | --- | --- | --- | --- | --- | --- | --- | --- | --- | --- | --- | --- | --- | --- | --- | --- | --- | --- | --- | --- | --- | --- | --- | --- | --- | --- | --- | --- | --- | --- | --- | --- | --- | --- | --- | --- | --- | --- | --- | --- | --- | --- | --- | --- | --- | --- | --- | --- | --- | --- | --- | --- | --- | --- | --- | --- | --- | --- | --- | --- | --- | --- | --- | --- | --- | --- | --- | --- | --- | --- | --- | --- | --- | --- | --- | --- | --- | --- | --- | --- | --- | --- | --- | --- | --- | --- | --- | --- | --- | --- | --- | --- | --- | --- | --- | --- | --- | --- | --- | --- | --- | --- | --- | --- | --- | --- | --- | --- | --- | --- | --- | --- | --- | --- | --- | --- | --- | --- | --- | --- | --- | --- | --- | --- | --- | --- | --- | --- | --- | --- | --- | --- | --- | --- | --- | --- | --- | --- | --- | --- | --- | --- | --- | --- | --- | --- | --- | --- | --- | --- | --- | --- | --- | --- | --- | --- | --- | --- | --- | --- | --- | --- | --- | --- | --- | --- | --- | --- | --- | --- | --- | --- | --- | --- | --- | --- | --- | --- | --- | --- | --- | --- | --- | --- | --- | --- | --- | --- | --- | --- | --- | --- | --- | --- | --- | --- | --- | --- | --- | --- | --- | --- | --- | --- | --- | --- | --- | --- | --- | --- | --- | --- | --- | --- | --- | --- | --- | --- | --- | --- | --- | --- | --- | --- | --- | --- | --- | --- | --- | --- | --- | --- | --- | --- | --- | --- | --- | --- | --- | --- | --- | --- | --- | --- | --- | --- | --- | --- | --- | --- | --- | --- | --- | --- | --- | --- | --- | --- | --- | --- | --- | --- | --- | --- | --- | --- | --- | --- | --- | --- | --- | --- | --- | --- | --- | --- | --- | --- | --- | --- | --- | --- | --- | --- | --- | --- | --- | --- | --- | --- | --- | --- | --- | --- | --- | --- | --- | --- | --- | --- | --- | --- | --- | --- | --- | --- | --- | --- | --- | --- | --- | --- | --- | --- | --- | --- | --- | --- | --- | --- | --- | --- | --- | --- | --- | --- | --- | --- | --- | --- | --- | --- | --- | --- | --- | --- | --- | --- | --- | --- | --- | --- | --- | --- | --- | --- | --- | --- | --- | --- | --- | --- | --- | --- | --- | --- | --- | --- | --- | --- | --- | --- | --- | --- | --- | --- | --- | --- | --- | --- | --- | --- | --- | --- | --- | --- | --- | --- | --- | --- | --- | --- | --- | --- | --- | --- | --- | --- | --- | --- | --- | --- | --- | --- | --- | --- | --- | --- | --- | --- | --- | --- | --- | --- | --- | --- | --- | --- | --- | --- | --- | --- | --- | --- | --- | --- | --- | --- | --- | --- | --- | --- | --- | --- | --- | --- | --- | --- | --- | --- | --- | --- | --- | --- | --- | --- | --- | --- | --- | --- | --- | --- | --- | --- | --- | --- | --- | --- | --- | --- | --- | --- | --- | --- | --- | --- | --- | --- | --- | --- | --- | --- | --- | --- | --- | --- | --- | --- | --- | --- | --- | --- | --- | --- | --- | --- | --- | --- | --- | --- | --- | --- | --- | --- | --- | --- | --- | --- | --- | --- | --- | --- | --- | --- | --- | --- | --- | --- | --- | --- | --- | --- | --- | --- | --- | --- | --- | --- | --- | --- | --- | --- | --- | --- | --- | --- | --- | --- | --- | --- | --- | --- | --- | --- | --- | --- | --- | --- | --- | --- | --- | --- | --- | --- | --- | --- | --- | --- | --- | --- | --- | --- | --- | --- | --- | --- | --- | --- | --- | --- | --- | --- | --- | --- | --- | --- | --- | --- | --- | --- | --- | --- | --- | --- | --- | --- | --- | --- | --- | --- | --- | --- | --- | --- | --- | --- | --- | --- | --- | --- | --- | --- | --- | --- | --- | --- | --- | --- | --- | --- | --- | --- | --- | --- | --- | --- | --- | --- | --- | --- | --- | --- | --- | --- | --- | --- | --- | --- | --- | --- | --- | --- | --- | --- | --- | --- | --- | --- | --- | --- | --- | --- | --- | --- | --- | --- | --- | --- | --- | --- | --- | --- | --- | --- | --- | --- | --- | --- | --- | --- | --- | --- | --- | --- | --- | --- | --- | --- | --- | --- | --- | --- | --- | --- | --- | --- | --- | --- | --- | --- | --- | --- | --- | --- | --- | --- | --- | --- | --- | --- | --- | --- | --- | --- | --- | --- | --- | --- | --- | --- | --- | --- | --- | --- | --- | --- | --- | --- | --- | --- | --- | --- | --- | --- | --- | --- | --- | --- | --- | --- | --- | --- | --- | --- | --- | --- | --- | --- | --- | --- | --- | --- | --- | --- | --- | --- | --- | --- | --- | --- | --- | --- | --- | --- | --- | --- | --- | --- | --- | --- | --- | --- | --- | --- | --- | --- | --- | --- | --- | --- | --- | --- | --- | --- | --- | --- | --- | --- | --- | --- | --- | --- | --- | --- | --- | --- | --- | --- | --- | --- | --- | --- | --- | --- | --- | --- | --- | --- | --- | --- | --- | --- | --- | --- | --- | --- | --- | --- | --- | --- | --- | --- | --- | --- | --- | --- | --- | --- | --- | --- | --- | --- | --- | --- | --- | --- | --- | --- | --- | --- | --- | --- | --- | --- | --- | --- | --- | --- | --- | --- | --- | --- | --- | --- | --- | --- | --- | --- | --- |
